# Supplementary material
Source: ML conference proceedings conference paper supplement (https://openreview.net/forum?id=yuCiAWddUFq)
Supplement: supplementary_material [file attachment]

---

# Supplementary materials for: Distribution-free inference for regression: discrete, continuous, and in between

---

**Yonghoon Lee**  
Department of Statistics  
University of Chicago  
Chicago, IL 60637  
yhoony31@uchicago.edu

**Rina Foygel Barber**  
Department of Statistics  
University of Chicago  
Chicago, IL 60637  
rina@uchicago.edu

## B Additional details for proof of Theorem 1

### B.1 Details for (6)

To compare  $P$  and  $P_a$ , we can equivalently characterize these distributions as follows:

- Draw  $X \sim P_X$ .
- Conditional on  $X$ , draw  $Z \mid X \in \mathcal{X}_m \sim \text{Bernoulli}(0.5)$  (for the distribution  $P$ , or for the distribution  $P_a$  if  $m = 1$ ), or  $Z \mid X \in \mathcal{X}_m \sim \text{Bernoulli}(0.5 + a_m \epsilon)$  (for the distribution  $P_a$  if  $m \geq 2$ ).
- Conditional on  $X, Z$  draw  $Y$  as

$$Y \mid X = x, Z = z \sim P_{Y|X=x}^z.$$

Define  $\tilde{P}$  as the distribution over  $(X, Y, Z)$  induced by  $P$ , and  $\tilde{P}_a$  as the distribution over  $(X, Y, Z)$  induced by  $P_a$ . Then the marginal distribution of  $(X, Y)$  under  $\tilde{P}$  and under  $\tilde{P}_a$  is given by  $P$  and by  $P_a$ , respectively.

Now consider comparing two distributions on triples  $(X_1, Z_1, Y_1), \dots, (X_n, Z_n, Y_n)$ . We will compare  $\tilde{P}^n$  versus the mixture distribution  $\tilde{P}_{\text{mix}}$  defined as follows:

- Draw  $A_1, A_2, \dots \stackrel{\text{iid}}{\sim} \text{Unif}\{\pm 1\}$ .
- Conditional on  $A_1, A_2, \dots$ , draw  $(X_1, Y_1, Z_1), \dots, (X_n, Y_n, Z_n) \stackrel{\text{iid}}{\sim} \tilde{P}_A$ .

Since in our characterization above, the distribution of  $Y_1, \dots, Y_n$  conditional on  $X_1, \dots, X_n$  and on  $Z_1, \dots, Z_n$  is the same for both, the only difference lies in the conditional distribution of  $Z_1, \dots, Z_n$  given  $X_1, \dots, X_n$ . Therefore, we can apply Lemma 2 with  $\epsilon_1 = 0$  and  $\epsilon_2 = \epsilon_3 = \dots = \epsilon$  to obtain

$$d_{\text{TV}}(\tilde{P}_{\text{mix}}, \tilde{P}^n) \leq 2n \sqrt{\sum_{m \geq 2} \epsilon^4 p_m^2}.$$

Now let  $P_{\text{mix}}$  be the marginal distribution of  $(X_1, Y_1), \dots, (X_n, Y_n)$  under  $\tilde{P}_{\text{mix}}$ . Noting that  $P^n$  is the marginal distribution of  $(X_1, Y_1), \dots, (X_n, Y_n)$  under  $\tilde{P}^n$ , we therefore have

$$d_{\text{TV}}(P_{\text{mix}}, P^n) \leq d_{\text{TV}}(\tilde{P}_{\text{mix}}, \tilde{P}^n) \leq 2n \sqrt{\sum_{m \geq 2} \epsilon^4 p_m^2}.$$

## C Proof of Theorem 2

First, define  $p_m = \mathbb{P}_{P_X} \{X = x^{(m)}\}$ . The following lemma establishes some results on its support, expected value, and concentration properties of  $Z$ :

**Lemma C.1.** *For  $Z$  and  $N_{\geq 2}$  defined as in (4) and (3), the following holds:*

$$\begin{aligned}\mathbb{E}[Z] &= \sum_{m=1}^{\infty} (\mu(x^{(m)}) - \mu_P(x^{(m)}))^2 \cdot (np_m - 1 + (1 - p_m)^n), \\ \mathbb{E}[Z | X_1, \dots, X_n] &= \sum_{m=1}^{\infty} (n_m - 1)_+ \cdot (\mu(x^{(m)}) - \mu_P(x^{(m)}))^2, \\ \text{Var}(\mathbb{E}[Z | X_1, \dots, X_n]) &\leq 2\mathbb{E}[Z], \\ \text{Var}(Z | X_1, \dots, X_n) &\leq N_{\geq 2} + 2\mathbb{E}[Z | X_1, \dots, X_n].\end{aligned}$$

In particular, the first part of the lemma will allow us to use  $\mathbb{E}[Z]$  to bound the error in  $\mu$ —here the calculations are similar to those in Chan et al. [2014] for the setting of testing discrete distributions. Recalling the definition of  $M_\gamma^*(P_X)$  given in (2), define

$$\Delta = \sqrt{\frac{2M_\gamma^*(P_X) + n}{n(n-1)}} \cdot \sqrt{\mathbb{E}[Z]}.$$

We have

$$\begin{aligned}\sum_{m=1}^{M_\gamma^*(P_X)} p_m |\mu(x^{(m)}) - \mu_P(x^{(m)})| &= \sum_{m=1}^{M_\gamma^*(P_X)} \frac{p_m |\mu(x^{(m)}) - \mu_P(x^{(m)})|}{\sqrt{2 + np_m}} \cdot \sqrt{2 + np_m} \\ &\leq \sqrt{\sum_{m=1}^{M_\gamma^*(P_X)} \frac{p_m^2 (\mu(x^{(m)}) - \mu_P(x^{(m)}))^2}{2 + np_m}} \cdot \sqrt{\sum_{m=1}^{M_\gamma^*(P_X)} 2 + np_m} \\ &\leq \sqrt{\frac{\mathbb{E}[Z]}{n(n-1)}} \cdot \sqrt{2M_\gamma^*(P_X) + n} \\ &= \Delta,\end{aligned}$$

where the next-to-last step holds by the following identity:

**Lemma C.2.** *For all  $n \geq 1$  and  $p \in [0, 1]$ ,  $np - 1 + (1 - p)^n \geq \frac{n(n-1)p^2}{2+np}$ .*

Next, we will use Lemma C.1 to relate  $\Delta$  and  $\widehat{\Delta}$ . By Chebyshev's inequality, conditional on  $X_1, \dots, X_n$ , with probability at least  $1 - \delta/4$  we have

$$Z \geq \mathbb{E}[Z | X_1, \dots, X_n] - \sqrt{\frac{\text{Var}(Z | X_1, \dots, X_n)}{\delta/4}} \geq \mathbb{E}[Z | X_1, \dots, X_n] - \sqrt{\frac{N_{\geq 2} + 2\mathbb{E}[Z | X_1, \dots, X_n]}{\delta/4}},$$

which can be relaxed to

$$\mathbb{E}[Z | X_1, \dots, X_n] \leq 2Z + 4\sqrt{N_{\geq 2}/\delta} + 8/\delta.$$

Marginalizing over  $X_1, \dots, X_n$ , this bound holds with probability at least  $1 - \delta/4$ . Moreover, again applying Chebyshev's inequality, with probability at least  $1 - \delta/4$  we have

$$\mathbb{E}[Z | X_1, \dots, X_n] \geq \mathbb{E}[Z] - \sqrt{\frac{\text{Var}(\mathbb{E}[Z | X_1, \dots, X_n])}{\delta/4}} \geq \mathbb{E}[Z] - \sqrt{\frac{2\mathbb{E}[Z]}{\delta/4}},$$

which can be relaxed to

$$\mathbb{E}[Z] \leq 2\mathbb{E}[Z | X_1, \dots, X_n] + 8/\delta.$$

Combining our bounds, then, we have  $\mathbb{E}[Z] \leq 4Z + 8\sqrt{N_{\geq 2}/\delta} + 24/\delta$  with probability at least  $1 - \delta/2$ . Since  $\mathbb{P}\left\{\widehat{M}_\gamma \geq M_\gamma^*(P_X)\right\} \geq 1 - \delta/2$  by Hoeffding's inequality, this implies that

$$\mathbb{P}\left\{\widehat{\Delta} \geq \Delta\right\} \geq 1 - \delta.$$

Now we verify the coverage properties of  $\widehat{C}_n$ . We have

$$\begin{aligned} \mathbb{P}\left\{\mu_P(X_{n+1}) \notin \widehat{C}_n(X_{n+1})\right\} &= \mathbb{P}\left\{|\mu_P(X_{n+1}) - \mu(X_{n+1})| > (\alpha - \delta - \gamma)^{-1}\widehat{\Delta}\right\} \\ &\leq \mathbb{P}\left\{\widehat{\Delta} < \Delta\right\} + \mathbb{P}\left\{|\mu_P(X_{n+1}) - \mu(X_{n+1})| > (\alpha - \delta - \gamma)^{-1}\Delta\right\} \\ &\leq \mathbb{P}\left\{\widehat{\Delta} < \Delta\right\} + \mathbb{P}\left\{X_{n+1} \notin \{x^{(1)}, \dots, x^{(M_\gamma^*(P_X))}\}\right\} \\ &\quad + \sum_{m=1}^{M_\gamma^*(P_X)} \mathbb{P}\left\{X_{n+1} = x^{(m)}, |\mu_P(X_{n+1}) - \mu(X_{n+1})| > (\alpha - \delta - \gamma)^{-1}\Delta\right\} \\ &\leq \delta + \gamma + \sum_{m=1}^{M_\gamma^*(P_X)} \mathbb{P}\left\{X_{n+1} = x^{(m)}, |\mu_P(X_{n+1}) - \mu(X_{n+1})| > (\alpha - \delta - \gamma)^{-1}\Delta\right\} \\ &\leq \delta + \gamma + \sum_{m=1}^{M_\gamma^*(P_X)} p_m \mathbb{1}\left\{|\mu_P(x^{(m)}) - \mu(x^{(m)})| > (\alpha - \delta - \gamma)^{-1}\Delta\right\} \\ &\leq \delta + \gamma + \frac{\sum_{m=1}^{M_\gamma^*(P_X)} p_m |\mu_P(x^{(m)}) - \mu(x^{(m)})|}{(\alpha - \delta - \gamma)^{-1}\Delta} \\ &\leq \delta + \gamma + \frac{\Delta}{(\alpha - \delta - \gamma)^{-1}\Delta} = \alpha, \end{aligned}$$

which verifies the desired coverage guarantee.

## D Proof of Theorem 3

First, we have  $\widehat{M}_\gamma \leq M$  almost surely by our assumption on  $P_X$ . Next we need to bound  $\mathbb{E}[Z_+]$ . We have

$$\begin{aligned} \mathbb{E}[Z_-] &\leq \mathbb{E}[(Z - \mathbb{E}[Z | X_1, \dots, X_n])_-] \text{ since this conditional expectation is nonnegative} \\ &\leq \sqrt{\mathbb{E}[(Z - \mathbb{E}[Z | X_1, \dots, X_n])^2]} \\ &= \sqrt{\mathbb{E}[\mathbb{E}[(Z - \mathbb{E}[Z | X_1, \dots, X_n])^2 | X_1, \dots, X_n]]} \\ &= \sqrt{\mathbb{E}[\text{Var}(Z | X_1, \dots, X_n)]} \\ &\leq \sqrt{\mathbb{E}[N_{\geq 2} + 2\mathbb{E}[Z | X_1, \dots, X_n]]} \text{ by Lemma C.1} \\ &= \sqrt{\mathbb{E}[N_{\geq 2}] + 2\mathbb{E}[Z]}. \end{aligned}$$

We then have

$$\mathbb{E}[Z_+] = \mathbb{E}[Z] + \mathbb{E}[Z_-] \leq \mathbb{E}[Z] + \sqrt{2\mathbb{E}[Z] + \mathbb{E}[N_{\geq 2}]} \leq 1.5\mathbb{E}[Z] + 1 + \sqrt{\mathbb{E}[N_{\geq 2}]}.$$

Next we need a lemma:

**Lemma D.1.** For all  $n \geq 1$  and  $p \in [0, 1]$ ,  $np - 1 + (1 - p)^n \leq \frac{n^2 p^2}{1 + np}$ .

Combined with the calculation of  $\mathbb{E}[Z]$  in Lemma C.1, we have

$$\begin{aligned}
\mathbb{E}[Z] &\leq \sum_{m=1}^M (\mu(x^{(m)}) - \mu_P(x^{(m)}))^2 \cdot \frac{n^2 p_m^2}{1 + n p_m} \\
&\leq \sum_{m=1}^M p_m \cdot (\mu(x^{(m)}) - \mu_P(x^{(m)}))^2 \cdot \frac{n^2 \cdot \eta/M}{1 + n \cdot \eta/M} \\
&= \frac{\eta n^2}{M + \eta n} \cdot \mathbb{E}_{P_X} [(\mu_P(X) - \mu(X))^2] \\
&\leq (\text{err}_\mu)^2 \cdot \frac{\eta n^2}{M + \eta n},
\end{aligned}$$

since we have assumed that  $P_X$  is supported on  $\{x^{(1)}, \dots, x^{(M)}\}$  and that  $\mathbb{P}_{P_X} \{X = x^{(m)}\} \leq \eta/M$  for all  $m$ , where we must have  $\eta \geq 1$ . Furthermore, we have

$$\begin{aligned}
\mathbb{E}[N_{\geq 2}] &= \sum_{m=1}^M \mathbb{P}\{n_m \geq 2\} \leq \sum_{m=1}^M \mathbb{E}[(n_m - 1)_+] \\
&= \sum_{m=1}^M n \cdot \mathbb{P}_{P_X} \{X = x^{(m)}\} - 1 + \left(1 - \mathbb{P}_{P_X} \{X = x^{(m)}\}\right)^n \text{ as calculated as in the proof of Lemma C.1} \\
&\leq \sum_{m=1}^M n \cdot \eta/M - 1 + (1 - \eta/M)^n \\
&\leq \sum_{m=1}^M \frac{n^2 (\eta/M)^2}{1 + n\eta/M} \text{ by Lemma D.1} \\
&= \frac{\eta^2 n^2}{M + \eta n}.
\end{aligned}$$

We also have  $N_{\geq 2} \leq M$  almost surely, and so combining these two bounds,  $\mathbb{E}[N_{\geq 2}] \leq \min\{\frac{\eta^2 n^2}{M}, M\}$ . Combining everything, then,

$$\mathbb{E}[Z_+] \leq 1.5(\text{err}_\mu)^2 \cdot \frac{\eta n^2}{M + \eta n} + 1 + \sqrt{\min\left\{\frac{\eta^2 n^2}{M}, M\right\}}.$$

Plugging these calculations into the definition of  $\widehat{\Delta}$ , we obtain

$$\begin{aligned}
\mathbb{E}[\widehat{\Delta}] &= \mathbb{E}\left[\sqrt{\frac{2\widehat{M}_\gamma + n}{n(n-1)}} \cdot \sqrt{4Z_+ + 8\sqrt{N_{\geq 2}/\delta} + 24/\delta}\right] \\
&\leq \mathbb{E}\left[\sqrt{\frac{2M + n}{n(n-1)}} \cdot \sqrt{4Z_+ + 8\sqrt{N_{\geq 2}/\delta} + 24/\delta}\right] \\
&\leq \sqrt{\frac{2M + n}{n(n-1)}} \cdot \sqrt{4\mathbb{E}[Z_+] + 8\sqrt{\mathbb{E}[N_{\geq 2}]/\delta} + 24/\delta} \\
&\leq \sqrt{\frac{2M + n}{n(n-1)}} \cdot \sqrt{4\left(1.5(\text{err}_\mu)^2 \cdot \frac{\eta n^2}{M + \eta n} + 1 + \sqrt{\min\left\{\frac{\eta^2 n^2}{M}, M\right\}}\right) + 8\sqrt{\min\left\{\frac{n^2}{M}, M\right\}} \cdot 1/\delta + 24/\delta} \\
&\leq \sqrt{\frac{2M + n}{n(n-1)}} \cdot \left[\sqrt{6(\text{err}_\mu)^2 \cdot \frac{\eta n^2}{M + \eta n}} + \sqrt{4(1 + 2/\sqrt{\delta})\sqrt{\min\left\{\frac{\eta^2 n^2}{M}, M\right\}} + \sqrt{4 + 24/\delta}}\right].
\end{aligned}$$

We can assume that  $M \leq n^2$  and  $n \geq 2$  (as otherwise, the upper bound would be trivial, since we must have  $\text{Leb}(\widehat{C}_n(X_{n+1})) \leq 1$  by construction). If  $M \geq n$ , then  $\frac{2M+n}{n(n-1)} \leq \frac{6M}{n^2}$  and the above

simplifies to

$$\mathbb{E} \left[ \widehat{\Delta} \right] \leq 6\sqrt{\eta} \cdot \text{err}_\mu + \sqrt{\frac{6(4 + 24/\delta)M}{n^2}} + \sqrt{24\eta(1 + 2/\sqrt{\delta})} \sqrt[4]{\frac{M}{n^2}},$$

and since we assume  $M \leq n^2$ , we therefore have

$$\mathbb{E} \left[ \widehat{\Delta} \right] \leq 6\sqrt{\eta} \cdot \text{err}_\mu + \left( \sqrt{6(4 + 24/\delta)} + \sqrt{24\eta(1 + 2/\sqrt{\delta})} \right) \cdot \sqrt[4]{\frac{M}{n^2}}. \quad (\text{D.2})$$

If instead  $M < n$ , then  $\frac{2M+n}{n(n-1)} \leq \frac{6}{n}$  and the above bound on  $\mathbb{E} \left[ \widehat{\Delta} \right]$  simplifies to

$$\mathbb{E} \left[ \widehat{\Delta} \right] \leq 6 \cdot \text{err}_\mu + \sqrt{\frac{6}{n}} \cdot \left[ \sqrt{4(1 + 2/\sqrt{\delta})\sqrt{M}} + \sqrt{4 + 24/\delta} \right],$$

which again yields the same bound (D.2) since  $M \geq 1$  and  $\eta \geq 1$ . Finally, by definition of  $\widehat{C}_n(X_{n+1})$ , we have

$$\mathbb{E} \left[ \text{Leb}(\widehat{C}_n(X_{n+1})) \right] \leq \mathbb{E} \left[ \widehat{\Delta} \right] \cdot \frac{2}{\alpha - \delta - \gamma},$$

which completes the proof for  $c$  chosen appropriately as a function of  $\alpha, \delta, \gamma, \eta$ .

## E Proofs of lemmas

### E.1 Proof of Lemma 1

Let  $x_{\text{med}}$  be the median of  $Q$ . Define

$$q_{<} = \mathbb{P}_Q \{X < x_{\text{med}}\}, \quad q_{>} = \mathbb{P}_Q \{X > x_{\text{med}}\},$$

and note that  $q_{<}, q_{>} \in [0, 0.5]$ . For  $X \sim Q$ , let  $Q_{<}$  be the distribution of  $X$  conditional on  $X < x_{\text{med}}$  and let  $Q_{>}$  be the distribution of  $X$  conditional on  $X > x_{\text{med}}$ . Then we can write

$$Q = q_{<} \cdot Q_{<} + (1 - q_{<} - q_{>}) \cdot \delta_{x_{\text{med}}} + q_{>} \cdot Q_{>},$$

where  $\delta_t$  denotes the point mass distribution at  $t$ . Now define

$$Q_0 = 2q_{<} \cdot Q_{<} + (1 - 2q_{<}) \cdot \delta_{x_{\text{med}}}$$

and

$$Q_1 = 2q_{>} \cdot Q_{>} + (1 - 2q_{>}) \cdot \delta_{x_{\text{med}}}.$$

Then clearly  $Q = 0.5Q_0 + 0.5Q_1$ . Next let  $\mu_0, \mu_1$  be the means of these two distributions, satisfying  $\frac{\mu_0 + \mu_1}{2} = \mu$  where  $\mu$  is the mean of  $Q$ , and let  $\sigma_0^2, \sigma_1^2$  be the variances of these two distributions. By the law of total variance, we have

$$\begin{aligned} \sigma^2 &= \text{Var}(0.5\delta_{\mu_0} + 0.5\delta_{\mu_1}) + \mathbb{E} \left[ 0.5\delta_{\sigma_0^2} + 0.5\delta_{\sigma_1^2} \right] \\ &= \frac{(\mu_1 - \mu_0)^2}{4} + 0.5\sigma_0^2 + 0.5\sigma_1^2. \end{aligned}$$

Next,  $Q_0$  is a distribution supported on  $[0, x_{\text{med}}]$  with mean  $\mu_0$ , so its variance is bounded as

$$\sigma_0^2 \leq \mu_0(x_{\text{med}} - \mu_0),$$

where the maximum is attained if all the mass is placed on the endpoints 0 or  $x_{\text{med}}$ . Similarly,  $Q_1$  is a distribution supported on  $[x_{\text{med}}, 1]$  with mean  $\mu_1$ , so its variance is bounded as

$$\sigma_1^2 \leq (1 - \mu_1)(\mu_1 - x_{\text{med}}).$$

Using the fact that  $\frac{\mu_0 + \mu_1}{2} = \mu$ , we can simplify to

$$\begin{aligned} \sigma_0^2 + \sigma_1^2 &\leq \mu_0(x_{\text{med}} - \mu_0) + (1 - \mu_1)(\mu_1 - x_{\text{med}}) \\ &= \mu(x_{\text{med}} - \mu_0) + (1 - \mu)(\mu_1 - x_{\text{med}}) - 0.5(\mu_1 - \mu_0)^2. \end{aligned}$$

Therefore, we have

$$\begin{aligned} \sigma^2 &= \frac{(\mu_1 - \mu_0)^2}{4} + 0.5\sigma_0^2 + 0.5\sigma_1^2 \leq 0.5\mu(x_{\text{med}} - \mu_0) + 0.5(1 - \mu)(\mu_1 - x_{\text{med}}) \\ &= 0.5(2\mu - 1)x_{\text{med}} - 0.5\mu\mu_0 + 0.5(1 - \mu)\mu_1 = 0.5(2\mu - 1)(x_{\text{med}} - \mu) + 0.25(\mu_1 - \mu_0). \end{aligned}$$

Next,  $|2\mu - 1| \leq 1$  since  $\mu \in [0, 1]$ , and  $|x_{\text{med}} - \mu| \leq 0.5|\mu_1 - \mu_0|$  since  $\mu_0 \leq x_{\text{med}} \leq \mu_1$  and  $\frac{\mu_0 + \mu_1}{2} = \mu$ . Therefore,  $\sigma^2 \leq 0.5(\mu_1 - \mu_0)$ , proving the lemma.

## E.2 Proof of Lemma 2

First we need a supporting lemma.

**Lemma E.1.** For any  $N \geq 1$  and any  $\epsilon \in [0, 0.5]$ ,

$$d_{\text{KL}}\left(0.5 \cdot \text{Binom}(N, 0.5 + \epsilon) + 0.5 \cdot \text{Binom}(N, 0.5 - \epsilon) \parallel \text{Binom}(N, 0.5)\right) \leq 8N(N-1)\epsilon^4.$$

*Proof of Lemma E.1.* Let  $f_0$  be the probability mass function of the  $\text{Binom}(N, 0.5)$  distribution, and let  $f_1$  be the probability mass function of the mixture  $0.5 \cdot \text{Binom}(N, 0.5 + \epsilon) + 0.5 \cdot \text{Binom}(N, 0.5 - \epsilon)$ . Then we would like to bound  $d_{\text{KL}}(f_1 \parallel f_0)$ . We calculate the ratio

$$\begin{aligned} \frac{f_1(k)}{f_0(k)} &= \frac{0.5 \cdot \binom{N}{k} (0.5 + \epsilon)^k (0.5 - \epsilon)^{N-k} + 0.5 \cdot \binom{N}{k} (0.5 - \epsilon)^k (0.5 + \epsilon)^{N-k}}{\binom{N}{k} (0.5)^N} \\ &= \frac{(1 + 2\epsilon)^k (1 - 2\epsilon)^{N-k} + (1 - 2\epsilon)^k (1 + 2\epsilon)^{N-k}}{2}. \end{aligned}$$

Therefore, it holds that

$$\begin{aligned} &\mathbb{E}_{\text{Binom}(N, 0.5)} \left[ \left( \frac{f_1(X)}{f_0(X)} \right)^2 \right] \\ &= \mathbb{E}_{\text{Binom}(N, 0.5)} \left[ \left( \frac{(1 + 2\epsilon)^X (1 - 2\epsilon)^{N-X} + (1 - 2\epsilon)^X (1 + 2\epsilon)^{N-X}}{2} \right)^2 \right] \\ &= \mathbb{E}_{\text{Binom}(N, 0.5)} \left[ \frac{(1 + 2\epsilon)^{2X} (1 - 2\epsilon)^{2N-2X} + (1 - 2\epsilon)^{2X} (1 + 2\epsilon)^{2N-2X} + 2(1 - 4\epsilon^2)^N}{4} \right] \\ &= \frac{(1 - 2\epsilon)^{2N} \mathbb{E}_{\text{Binom}(N, 0.5)} \left[ \left( \frac{1+2\epsilon}{1-2\epsilon} \right)^{2X} \right] + (1 + 2\epsilon)^{2N} \mathbb{E}_{\text{Binom}(N, 0.5)} \left[ \left( \frac{1-2\epsilon}{1+2\epsilon} \right)^{2X} \right] + 2(1 - 4\epsilon^2)^N}{4} \\ &= \frac{(1 - 2\epsilon)^{2N} \mathbb{E}_{\text{Bern}(0.5)} \left[ \left( \frac{1+2\epsilon}{1-2\epsilon} \right)^{2X} \right]^N + (1 + 2\epsilon)^{2N} \mathbb{E}_{\text{Bern}(0.5)} \left[ \left( \frac{1-2\epsilon}{1+2\epsilon} \right)^{2X} \right]^N + 2(1 - 4\epsilon^2)^N}{4} \\ &= \frac{(1 - 2\epsilon)^{2N} \left[ 0.5 \left( \frac{1+2\epsilon}{1-2\epsilon} \right)^2 + 0.5 \right]^N + (1 + 2\epsilon)^{2N} \left[ 0.5 \left( \frac{1-2\epsilon}{1+2\epsilon} \right)^2 + 0.5 \right]^N + 2(1 - 4\epsilon^2)^N}{4} \\ &= \frac{[0.5(1 + 2\epsilon)^2 + 0.5(1 - 2\epsilon)^2]^N + [0.5(1 - 2\epsilon)^2 + 0.5(1 + 2\epsilon)^2]^N + 2(1 - 4\epsilon^2)^N}{4} \\ &= \frac{(1 + 4\epsilon^2)^N + (1 - 4\epsilon^2)^N}{2} \\ &= 1 + \sum_{k \geq 1} \binom{N}{2k} (4\epsilon^2)^{2k} \\ &= 1 + \sum_{k \geq 1} \frac{N(N-1) \dots (N-2k+2)(N-2k+1)}{(2k)!} (4\epsilon^2)^{2k} \\ &\leq 1 + \sum_{k \geq 1} \frac{(N(N-1))^k}{2^k k!} (4\epsilon^2)^{2k} \\ &\leq e^{8\epsilon^4 N(N-1)}. \end{aligned}$$

Applying Jensen's inequality, we then have

$$\begin{aligned} d_{\text{KL}}(f_1 \parallel f_0) &= \sum_{k=0}^n f_1(k) \log \left( \frac{f_1(k)}{f_0(k)} \right) = \mathbb{E}_{f_1} \left[ \log \left( \frac{f_1(X)}{f_0(X)} \right) \right] \leq \log \left( \mathbb{E}_{f_1} \left[ \frac{f_1(X)}{f_0(X)} \right] \right) \\ &= \log \left( \mathbb{E}_{\text{Binom}(N, 0.5)} \left[ \left( \frac{f_1(X)}{f_0(X)} \right)^2 \right] \right) \leq \log \left( e^{8\epsilon^4 N(N-1)} \right) = 8\epsilon^4 N(N-1). \end{aligned}$$

□

Now we turn to the proof of Lemma 2. Let  $p_m = \mathbb{P}\{X \in \mathcal{X}_m\}$  for each  $m = 1, 2, \dots$ . Define a distribution  $P'_0$  on  $(W, Z) \in \mathbb{N} \times \{0, 1\}$  as:

$$\text{Draw } W \sim \sum_{m=1}^{\infty} p_m \delta_m, \text{ and draw } Z \sim \text{Bernoulli}(0.5), \text{ independently from } W.$$

and for any signs  $a_1, a_2, \dots \in \{\pm 1\}$ , define a distribution  $P'_a$  on  $(W, Z) \in \mathbb{N} \times \{0, 1\}$  as:

$$\text{Draw } W \sim \sum_{m=1}^{\infty} p_m \delta_m, \text{ and conditional on } W, \text{ draw } Z|W = m \sim \text{Bernoulli}(0.5 + a_m \cdot \epsilon_m).$$

Then define  $\tilde{P}'_0 = (P'_0)^n$  and define  $\tilde{P}'_1$  as the following mixture distribution.

- Draw  $A_1, A_2, \dots \stackrel{\text{iid}}{\sim} \text{Unif}\{\pm 1\}$ .
- Conditional on  $A_1, A_2, \dots$ , draw  $(W_1, Z_1), \dots, (W_n, Z_n) \stackrel{\text{iid}}{\sim} P'_{A_i}$ .

Note that  $(X_1, Z_1), \dots, (X_n, Z_n) \sim \tilde{P}'_0$  can be drawn by first drawing  $(W_1, Z_1), \dots, (W_n, Z_n) \sim \tilde{P}'_0$  and then drawing  $X_i|W_i \sim P_{X|X \in \mathcal{X}_{W_i}}$  for each  $i$ . Similarly,  $(X_1, Z_1), \dots, (X_n, Z_n) \sim \tilde{P}'_1$  is equivalent to first drawing  $(W_1, Z_1), \dots, (W_n, Z_n) \sim \tilde{P}'_1$  and then drawing  $X_i|W_i \sim P_{X|X \in \mathcal{X}_{W_i}}$  for each  $i$ . This implies  $d_{\text{TV}}(\tilde{P}'_1 || \tilde{P}'_0) \leq d_{\text{TV}}(\tilde{P}'_1 || \tilde{P}'_0)$ .

Now we can calculate the probability mass function of  $\tilde{P}'_0$  as

$$\tilde{P}'_0((w_1, z_1), \dots, (w_n, z_n)) = \prod_{i=1}^n (p_{w_i} \cdot 0.5),$$

and for  $\tilde{P}'_1$  as

$$\tilde{P}'_1((w_1, z_1), \dots, (w_n, z_n)) = \mathbb{E}_{A_i \stackrel{\text{iid}}{\sim} \text{Unif}\{\pm 1\}} \left[ \prod_{i=1}^n (p_{w_i} \cdot (0.5 + A_{w_i} \epsilon_m)^{z_i} \cdot (0.5 - A_{w_i} \epsilon_m)^{1-z_i}) \right].$$

Defining summary statistics

$$n_m = \sum_{i=1}^n \mathbb{1}\{w_i = m\} \text{ and } k_m = \sum_{i=1}^n \mathbb{1}\{w_i = m, z_i = 1\},$$

we can rewrite the above as

$$\tilde{P}'_0((w_1, z_1), \dots, (w_n, z_n)) = \prod_{m=1}^{\infty} p_m^{n_m} \cdot 0.5^{n_m},$$

and

$$\begin{aligned} \tilde{P}'_1((w_1, z_1), \dots, (w_n, z_n)) &= \mathbb{E}_{A_i \stackrel{\text{iid}}{\sim} \text{Unif}\{\pm 1\}} \left[ \prod_{m=1}^{\infty} p_m^{n_m} \cdot (0.5 + A_m \epsilon_m)^{k_m} \cdot (0.5 - A_m \epsilon_m)^{n_m - k_m} \right] \\ &= \prod_{m=1}^{\infty} p_m^{n_m} \cdot \frac{1}{2} \sum_{a_m \in \{\pm 1\}} (0.5 + a_m \epsilon_m)^{k_m} \cdot (0.5 - a_m \epsilon_m)^{n_m - k_m} \end{aligned}$$

We then calculate

$$\begin{aligned}
d_{\text{KL}}(\tilde{P}'_1 || \tilde{P}'_0) &= \mathbb{E}_{\tilde{P}'_1} \left[ \log \left( \frac{\tilde{P}'_1((W_1, Z_1), \dots, (W_n, Z_n))}{\tilde{P}'_0((W_1, Z_1), \dots, (W_n, Z_n))} \right) \right] \\
&= \mathbb{E}_{\tilde{P}'_1} \left[ \log \left( \frac{\prod_{m=1}^{\infty} p_m^{N_m} \cdot \frac{1}{2} \sum_{a_m \in \{\pm 1\}} (0.5 + a_m \epsilon_m)^{K_m} \cdot (0.5 - a_m \epsilon_m)^{N_m - K_m}}{\prod_{m=1}^{\infty} p_m^{N_m} \cdot (0.5)^{N_m}} \right) \right] \\
&= \sum_{m=1}^{\infty} \mathbb{E}_{\tilde{P}'_1} \left[ \log \left( \frac{\frac{1}{2} \sum_{a_m \in \{\pm 1\}} (0.5 + a_m \epsilon_m)^{K_m} \cdot (0.5 - a_m \epsilon_m)^{N_m - K_m}}{(0.5)^{N_m}} \right) \right] \\
&= \sum_{m=1}^{\infty} \mathbb{E}_{\tilde{P}'_1} \left[ \mathbb{E}_{\tilde{P}'_1} \left[ \log \left( \frac{\frac{1}{2} \sum_{a_m \in \{\pm 1\}} (0.5 + a_m \epsilon_m)^{K_m} \cdot (0.5 - a_m \epsilon_m)^{N_m - K_m}}{(0.5)^{N_m}} \right) \mid N_m \right] \right],
\end{aligned}$$

where

$$N_m = \sum_{i=1}^n \mathbb{1}\{W_i = m\} \text{ and } K_m = \sum_{i=1}^n \mathbb{1}\{W_i = m, Z_i = 1\},$$

Next, we calculate the conditional expectation in the last expression above. If  $N_m = 0$  then trivially it is equal to  $\log(1) = 0$ . If  $N_m \geq 1$ , then under  $\tilde{P}'_1$ , we can see that

$$K_m \mid N_m \sim 0.5 \cdot \text{Binom}(N_m, 0.5 + \epsilon_m) + 0.5 \cdot \text{Binom}(N_m, 0.5 - \epsilon_m),$$

and therefore,

$$\begin{aligned}
&\mathbb{E}_{\tilde{P}'_1} \left[ \log \left( \frac{\frac{1}{2} \sum_{a_m \in \{\pm 1\}} (0.5 + a_m \epsilon_m)^{K_m} \cdot (0.5 - a_m \epsilon_m)^{N_m - K_m}}{(0.5)^{N_m}} \right) \mid N_m \right] \\
&= d_{\text{KL}}(0.5 \cdot \text{Binom}(N_m, 0.5 + \epsilon_m) + 0.5 \cdot \text{Binom}(N_m, 0.5 - \epsilon_m) \parallel \text{Binom}(N_m, 0.5)) \leq 8N_m(N_m - 1)\epsilon_m^4,
\end{aligned}$$

where the last step applies Lemma E.1. Therefore,

$$\begin{aligned}
d_{\text{KL}}(\tilde{P}'_1 || \tilde{P}'_0) &\leq \sum_{m=1}^{\infty} \mathbb{E}_{\tilde{P}'_1} [8N_m(N_m - 1)\epsilon_m^4] \\
&= 8 \sum_{m=1}^{\infty} \epsilon_m^4 \mathbb{E}_{\tilde{P}'_1} [N_m^2 - N_m] \\
&= 8 \sum_{m=1}^{\infty} \epsilon_m^4 ((np_m(1 - p_m) + n^2 p_m^2) - np_m) \\
&= 8 \cdot n(n - 1) \sum_{m=1}^{\infty} \epsilon_m^4 p_m^2,
\end{aligned}$$

since  $N_m \sim \text{Binom}(n, p_m)$  by definition. Applying Pinsker's inequality and  $d_{\text{TV}}(\tilde{P}'_1 || \tilde{P}'_0) \leq d_{\text{TV}}(\tilde{P}'_1 || \tilde{P}'_0)$  completes the proof.

### E.3 Proof of Lemma C.1

Define

$$Z_m = \begin{cases} (n_m - 1) \cdot ((\bar{y}_m - \mu(x^{(m)}))^2 - n_m^{-1} s_m^2), & n_m \geq 2, \\ 0, & n_m = 0 \text{ or } 1. \end{cases}$$

Then  $Z = \sum_{m=1}^{\infty} Z_m$ . Now we calculate the conditional mean and variance. Conditional on  $X_1, \dots, X_n$ ,  $\bar{y}_m$  and  $s_m^2$  are the sample mean and sample variance of  $n_m$  i.i.d. draws from a distribution with mean  $\mu_P(x^{(m)})$  and variance  $\sigma_P^2(x^{(m)})$ , supported on  $[0, 1]$ , where we let  $\sigma_P^2(x^{(m)})$  be the variance of the distribution of  $Y|X = x^{(m)}$ , under the joint distribution  $P$ . For any  $m$  with  $n_m \geq 2$ , we therefore have

$$\mathbb{E}[\bar{y}_m \mid X_1, \dots, X_n] = \mu_P(x^{(m)}), \text{Var}(\bar{y}_m \mid X_1, \dots, X_n) = n_m^{-1} \sigma_P^2(x^{(m)}) = \mathbb{E}[n_m^{-1} s_m^2 \mid X_1, \dots, X_n],$$



and so

$$\begin{aligned} & \mathbb{E} \left[ (\bar{y}_m - \mu(x^{(m)}))^2 - n_m^{-1} s_m^2 \mid X_1, \dots, X_n \right] \\ &= n_m^{-1} \sigma_P^2(x^{(m)}) + (\mu_P(x^{(m)}) - \mu(x^{(m)}))^2 - n_m^{-1} \sigma_P^2(x^{(m)}) = (\mu_P(x^{(m)}) - \mu(x^{(m)}))^2. \end{aligned}$$

Next, we have  $(n_1, \dots, n_M) \sim \text{Multinom}(n, p)$ , which implies that marginally  $n_m \sim \text{Binom}(n, p_m)$  and so

$$\mathbb{E}[(n_m - 1)_+] = \mathbb{E}[n_m - 1 + \mathbb{1}\{n_m = 0\}] = np_m - 1 + (1 - p_m)^n.$$

Combining these calculations completes the proof for the expected value  $\mathbb{E}[Z]$  and conditional expected value  $\mathbb{E}[Z \mid X_1, \dots, X_n]$ .

Next, we calculate conditional and marginal variance. We have

$$\begin{aligned} & \text{Var} \left( (\bar{y}_m - \mu(x^{(m)}))^2 - n_m^{-1} s_m^2 \mid X_1, \dots, X_n \right) \\ &= \text{Var} \left( (\bar{y}_m - \mu(x^{(m)}))^2 - n_m^{-1} s_m^2 - (\mu_P(x^{(m)}) - \mu(x^{(m)}))^2 \mid X_1, \dots, X_n \right) \\ &\leq \mathbb{E} \left[ \left( (\bar{y}_m - \mu(x^{(m)}))^2 - n_m^{-1} s_m^2 - (\mu_P(x^{(m)}) - \mu(x^{(m)}))^2 \right)^2 \mid X_1, \dots, X_n \right] \\ &= \mathbb{E} \left[ \left( (\bar{y}_m - \mu_P(x^{(m)}))^2 + 2(\bar{y}_m - \mu_P(x^{(m)}))(\mu_P(x^{(m)}) - \mu(x^{(m)})) - n_m^{-1} s_m^2 \right)^2 \mid X_1, \dots, X_n \right] \\ &\leq 4\mathbb{E} \left[ \left( (\bar{y}_m - \mu_P(x^{(m)})) \right)^4 \mid X_1, \dots, X_n \right] \\ &\quad + 2\mathbb{E} \left[ \left( 2(\bar{y}_m - \mu_P(x^{(m)}))(\mu_P(x^{(m)}) - \mu(x^{(m)})) \right)^2 \mid X_1, \dots, X_n \right] \\ &\quad + 4\mathbb{E} \left[ \left( n_m^{-1} s_m^2 \right)^2 \mid X_1, \dots, X_n \right], \end{aligned}$$

where the last step holds since  $(a + b + c)^2 \leq 4a^2 + 2b^2 + 4c^2$  for any  $a, b, c$ . Now we bound each term separately. First, we have

$$\begin{aligned} & \mathbb{E} \left[ \left( (\bar{y}_m - \mu_P(x^{(m)})) \right)^4 \mid X_1, \dots, X_n \right] \\ &= \frac{1}{n_m^4} \sum_{\substack{i_1, i_2, i_3, i_4 \text{ s.t.} \\ X_{i_1} = X_{i_2} = X_{i_3} = X_{i_4} = x^{(m)}}} \mathbb{E} \left[ \prod_{k=1}^4 (Y_{i_k} - \mu_P(x^{(m)})) \mid X_1, \dots, X_n \right] \\ &= \frac{1}{n_m^4} \left[ n_m \cdot \mathbb{E} \left[ (Y - \mu_P(x^{(m)}))^4 \mid X = x^{(m)} \right] + 3n_m(n_m - 1) \cdot \mathbb{E} \left[ (Y - \mu_P(x^{(m)}))^2 \mid X = x^{(m)} \right]^2 \right] \\ &\leq \frac{1}{n_m^4} \left[ n_m \cdot \sigma_P^2(x^{(m)}) + 3n_m(n_m - 1) \cdot (\sigma_P^2(x^{(m)}))^2 \right] \\ &\leq \frac{1}{n_m^4} \left[ n_m \cdot \frac{1}{4} + 3n_m(n_m - 1) \cdot \left(\frac{1}{4}\right)^2 \right] = \frac{3n_m + 1}{16n_m^3}, \end{aligned}$$

where the second step holds by counting tuples  $(i_1, i_2, i_3, i_4)$  where either all four indices are equal, or there are two pairs of equal indices (since otherwise, the expected value of the product is zero).

Next,

$$\begin{aligned} & \mathbb{E} \left[ \left( 2(\bar{y}_m - \mu_P(x^{(m)}))(\mu_P(x^{(m)}) - \mu(x^{(m)})) \right)^2 \mid X_1, \dots, X_n \right] \\ &= 4(\mu_P(x^{(m)}) - \mu(x^{(m)}))^2 \mathbb{E} \left[ (\bar{y}_m - \mu_P(x^{(m)}))^2 \mid X_1, \dots, X_n \right] \\ &= 4(\mu_P(x^{(m)}) - \mu(x^{(m)}))^2 \cdot n_m^{-1} \sigma_P^2(x^{(m)}) \\ &\leq n_m^{-1} (\mu_P(x^{(m)}) - \mu(x^{(m)}))^2. \end{aligned}$$

Finally, since  $s_m^2 \leq \frac{n_m}{4(n_m-1)}$  holds deterministically,

$$\begin{aligned} \mathbb{E} \left[ (n_m^{-1} s_m^2)^2 \mid X_1, \dots, X_n \right] &\leq n_m^{-2} \cdot \frac{n_m}{4(n_m-1)} \cdot \mathbb{E} [s_m^2 \mid X_1, \dots, X_n] \\ &= n_m^{-2} \cdot \frac{n_m}{4(n_m-1)} \cdot \sigma_P^2(x^{(m)}) \leq \frac{1}{16n_m(n_m-1)}. \end{aligned}$$

Combining everything, then,

$$\begin{aligned} \text{Var} \left( (\bar{y}_m - \mu(x^{(m)}))^2 - n_m^{-1} s_m^2 \mid X_1, \dots, X_n \right) \\ \leq 4 \cdot \frac{3n_m + 1}{16n_m^3} + 2 \cdot n_m^{-1} (\mu_P(x^{(m)}) - \mu(x^{(m)}))^2 + 4 \cdot \frac{1}{16n_m(n_m-1)}, \end{aligned}$$

and so for  $n_m \geq 2$ ,

$$\begin{aligned} \text{Var}(Z_m \mid X_1, \dots, X_n) \\ \leq (n_m - 1)^2 \cdot \left[ 4 \cdot \frac{3n_m + 1}{16n_m^3} + 2 \cdot n_m^{-1} (\mu_P(x^{(m)}) - \mu(x^{(m)}))^2 + 4 \cdot \frac{1}{16n_m(n_m-1)} \right] \\ \leq 1 + 2(n_m - 1) \cdot (\mu_P(x^{(m)}) - \mu(x^{(m)}))^2 = 0.5 + 2\mathbb{E}[Z_m \mid X_1, \dots, X_n]. \end{aligned}$$

If instead  $n_m = 0$  or  $n_m = 1$  then  $Z_m = 0$  by definition, and so  $\text{Var}(Z_m \mid X_1, \dots, X_n) = 0$ . Therefore, in all cases, we have

$$\text{Var}(Z_m \mid X_1, \dots, X_n) \leq \mathbb{1}\{n_m \geq 2\} + 2\mathbb{E}[Z_m \mid X_1, \dots, X_n].$$

It is also clear that, conditional on  $X_1, \dots, X_n$ , the  $Z_m$ 's are independent, and so

$$\text{Var}(Z \mid X_1, \dots, X_n) = \sum_{m=1}^{\infty} \text{Var}(Z_m \mid X_1, \dots, X_n) \leq N_{\geq 2} + 2\mathbb{E}[Z \mid X_1, \dots, X_n].$$

Finally, we need to bound  $\text{Var}(\mathbb{E}[Z \mid X_1, \dots, X_n])$ . First, we have

$$\begin{aligned} \text{Var}(\mathbb{E}[Z_m \mid X_1, \dots, X_n]) &= \text{Var}((n_m - 1)_+ \cdot (\mu_P(x^{(m)}) - \mu(x^{(m)}))^4) \\ &\leq \text{Var}((n_m - 1)_+ \cdot (\mu_P(x^{(m)}) - \mu(x^{(m)}))^2), \end{aligned}$$

and we can calculate

$$\begin{aligned} \text{Var}((n_m - 1)_+) \\ &= \text{Var}(n_m + \mathbb{1}\{n_m = 0\}) \\ &= \text{Var}(n_m) + \text{Var}(\mathbb{1}\{n_m = 0\}) + 2\text{Cov}(n_m, \mathbb{1}\{n_m = 0\}) \\ &= \text{Var}(n_m) + \text{Var}(\mathbb{1}\{n_m = 0\}) - 2\mathbb{E}[n_m] \mathbb{E}[\mathbb{1}\{n_m = 0\}] \text{ since } n_m \cdot \mathbb{1}\{n_m = 0\} = 0 \text{ almost surely} \\ &= np_m(1-p_m) + (1-p_m)^n(1 - (1-p_m)^n) - 2np_m(1-p_m)^n. \end{aligned}$$

Therefore,

$$\begin{aligned} 2\mathbb{E}[(n_m - 1)_+] - \text{Var}((n_m - 1)_+) \\ &= 2np_m - 2 + 2(1-p_m)^n - np_m(1-p_m) - (1-p_m)^n(1 - (1-p_m)^n) + 2np_m(1-p_m)^n \\ &= np_m(1+p_m) + (1-p_m)^n(1 + 2np_m + (1-p_m)^n) - 2 \\ &\geq 0, \end{aligned}$$

where the last step holds since, defining  $f(t) = nt(1+t) + (1-t)^n(1+2nt + (1-t)^n)$ , we can see that  $f(0) = 2$  and  $f'(t) \geq 0$  for all  $t \in [0, 1]$ . This verifies that

$$\begin{aligned} \text{Var}(\mathbb{E}[Z_m \mid X_1, \dots, X_n]) &\leq \text{Var}((n_m - 1)_+ \cdot (\mu_P(x^{(m)}) - \mu(x^{(m)}))^2) \\ &\leq 2\mathbb{E}[(n_m - 1)_+] \cdot (\mu_P(x^{(m)}) - \mu(x^{(m)}))^2 = 2\mathbb{E}[Z_m]. \end{aligned}$$

Next, for any  $m \neq m'$ ,

$$\begin{aligned} & \text{Cov}(\mathbb{E}[Z_m | X_1, \dots, X_n], \mathbb{E}[Z_{m'} | X_1, \dots, X_n]) \\ &= \text{Cov}((n_m - 1)_+, (n_{m'} - 1)_+) \cdot (\mu_P(x^{(m)}) - \mu(x^{(m)}))^2 \cdot (\mu_P(x^{(m')}) - \mu(x^{(m')}))^2 \\ &\leq 0. \end{aligned}$$

For the last step, we use the fact that  $\text{Cov}((n_m - 1)_+, (n_{m'} - 1)_+) \leq 0$ , which holds since, conditional on  $n_m$ , we have  $n_{m'} \sim \text{Binom}\left(n - n_m, \frac{p_{m'}}{1 - p_m}\right)$ , and so the distribution of  $n_{m'}$  is stochastically smaller whenever  $n_m$  is larger. Therefore,

$$\text{Var}(\mathbb{E}[Z | X_1, \dots, X_n]) \leq \sum_{m=1}^{\infty} \text{Var}(\mathbb{E}[Z_m | X_1, \dots, X_n]) \leq \sum_{m=1}^{\infty} 2\mathbb{E}[Z_m] = 2\mathbb{E}[Z].$$

#### E.4 Proofs of Lemma C.2 and Lemma D.1

Replacing  $p$  with  $1 - s$ , equivalently, we need to show that, for all  $s \in [0, 1]$ ,

$$\frac{n(n-1)(1-s)^2}{2+n(1-s)} \leq n(1-s) - 1 + s^n \leq \frac{n^2(1-s)^2}{1+n(1-s)}.$$

After simplifying, this is equivalent to proving that

$$\frac{n(1-s)^2 + 2n(1-s)}{2+n(1-s)} \geq 1 - s^n \geq \frac{n(1-s)}{1+n(1-s)},$$

which we can further simplify to

$$\frac{n(1-s) + 2n}{2+n(1-s)} \geq 1 + s + \dots + s^{n-1} \geq \frac{n}{1+n(1-s)} \quad (\text{E.2})$$

by dividing by  $1 - s$  (note that this division can be performed whenever  $s < 1$ , while if  $s = 1$ , then the desired inequalities hold trivially).

Now we address the two desired inequalities separately. For the left-hand inequality in (E.2), define

$$h(s) = (2 + n(1 - s)) \cdot (s + s^2 + \dots + s^{n-1}) = ns + 2(s + s^2 + \dots + s^{n-1}) - ns^n.$$

We calculate  $h(1) = 2(n - 1)$ , and for any  $s \in [0, 1]$ ,

$$\begin{aligned} h'(s) &= n + \sum_{i=1}^{n-1} 2is^{i-1} - n^2s^{n-1} \geq n + \sum_{i=1}^{n-1} 2is^{n-1} - n^2s^{n-1} \\ &= n + s^{n-1} \left( \sum_{i=1}^{n-1} 2i - n^2 \right) = n - ns^{n-1} \geq 0, \end{aligned}$$

where the first inequality holds since  $s^{i-1} \geq s^{n-1}$  for all  $i = 1, \dots, n - 1$ , and the second inequality holds since  $s^{n-1} \leq 1$ . Therefore,  $h(s) \leq h(1) = 2(n - 1)$  for all  $s \in [0, 1]$ , and so

$$\begin{aligned} 1 + s + \dots + s^{n-1} &= \frac{(1 + s + \dots + s^{n-1}) \cdot (2 + n(1 - s))}{2 + n(1 - s)} \\ &= \frac{2 + n(1 - s) + h(s)}{2 + n(1 - s)} \leq \frac{2 + n(1 - s) + 2(n - 1)}{2 + n(1 - s)} = \frac{n(1 - s) + 2n}{2 + n(1 - s)}, \end{aligned}$$

as desired.

To verify the right-hand inequality in (E.2), we have

$$\begin{aligned} 1 + s + \dots + s^{n-1} &= \frac{(1 + s + \dots + s^{n-1}) \cdot (1 + n(1 - s))}{1 + n(1 - s)} \\ &= \frac{(n + 1)(1 + s + \dots + s^{n-1}) - n(s + s^2 + \dots + s^n)}{1 + n(1 - s)} \\ &= \frac{n + (1 + s + \dots + s^{n-1}) - ns^n}{1 + n(1 - s)} \\ &\geq \frac{n}{1 + n(1 - s)}, \end{aligned}$$

where the last step holds since, for  $s \in [0, 1]$ , we have  $s^i \geq s^n$  for all  $i = 0, 1, \dots, n - 1$ .

## References

Siu-On Chan, Ilias Diakonikolas, Paul Valiant, and Gregory Valiant. Optimal algorithms for testing closeness of discrete distributions. In *Proceedings of the twenty-fifth annual ACM-SIAM symposium on Discrete algorithms*, pages 1193–1203. SIAM, 2014.
